# Supplementary figures and images for: Rethinking the molecular structures of WVIOxsites dispersed on titania: distinct mono-oxo configurations at 430 °C and temperature-dependent transformations
Source: Royal Society of Chemistry journal article supplement (doi:10.1039/d2dt00595f), 2022-01-01

FIGURE S1

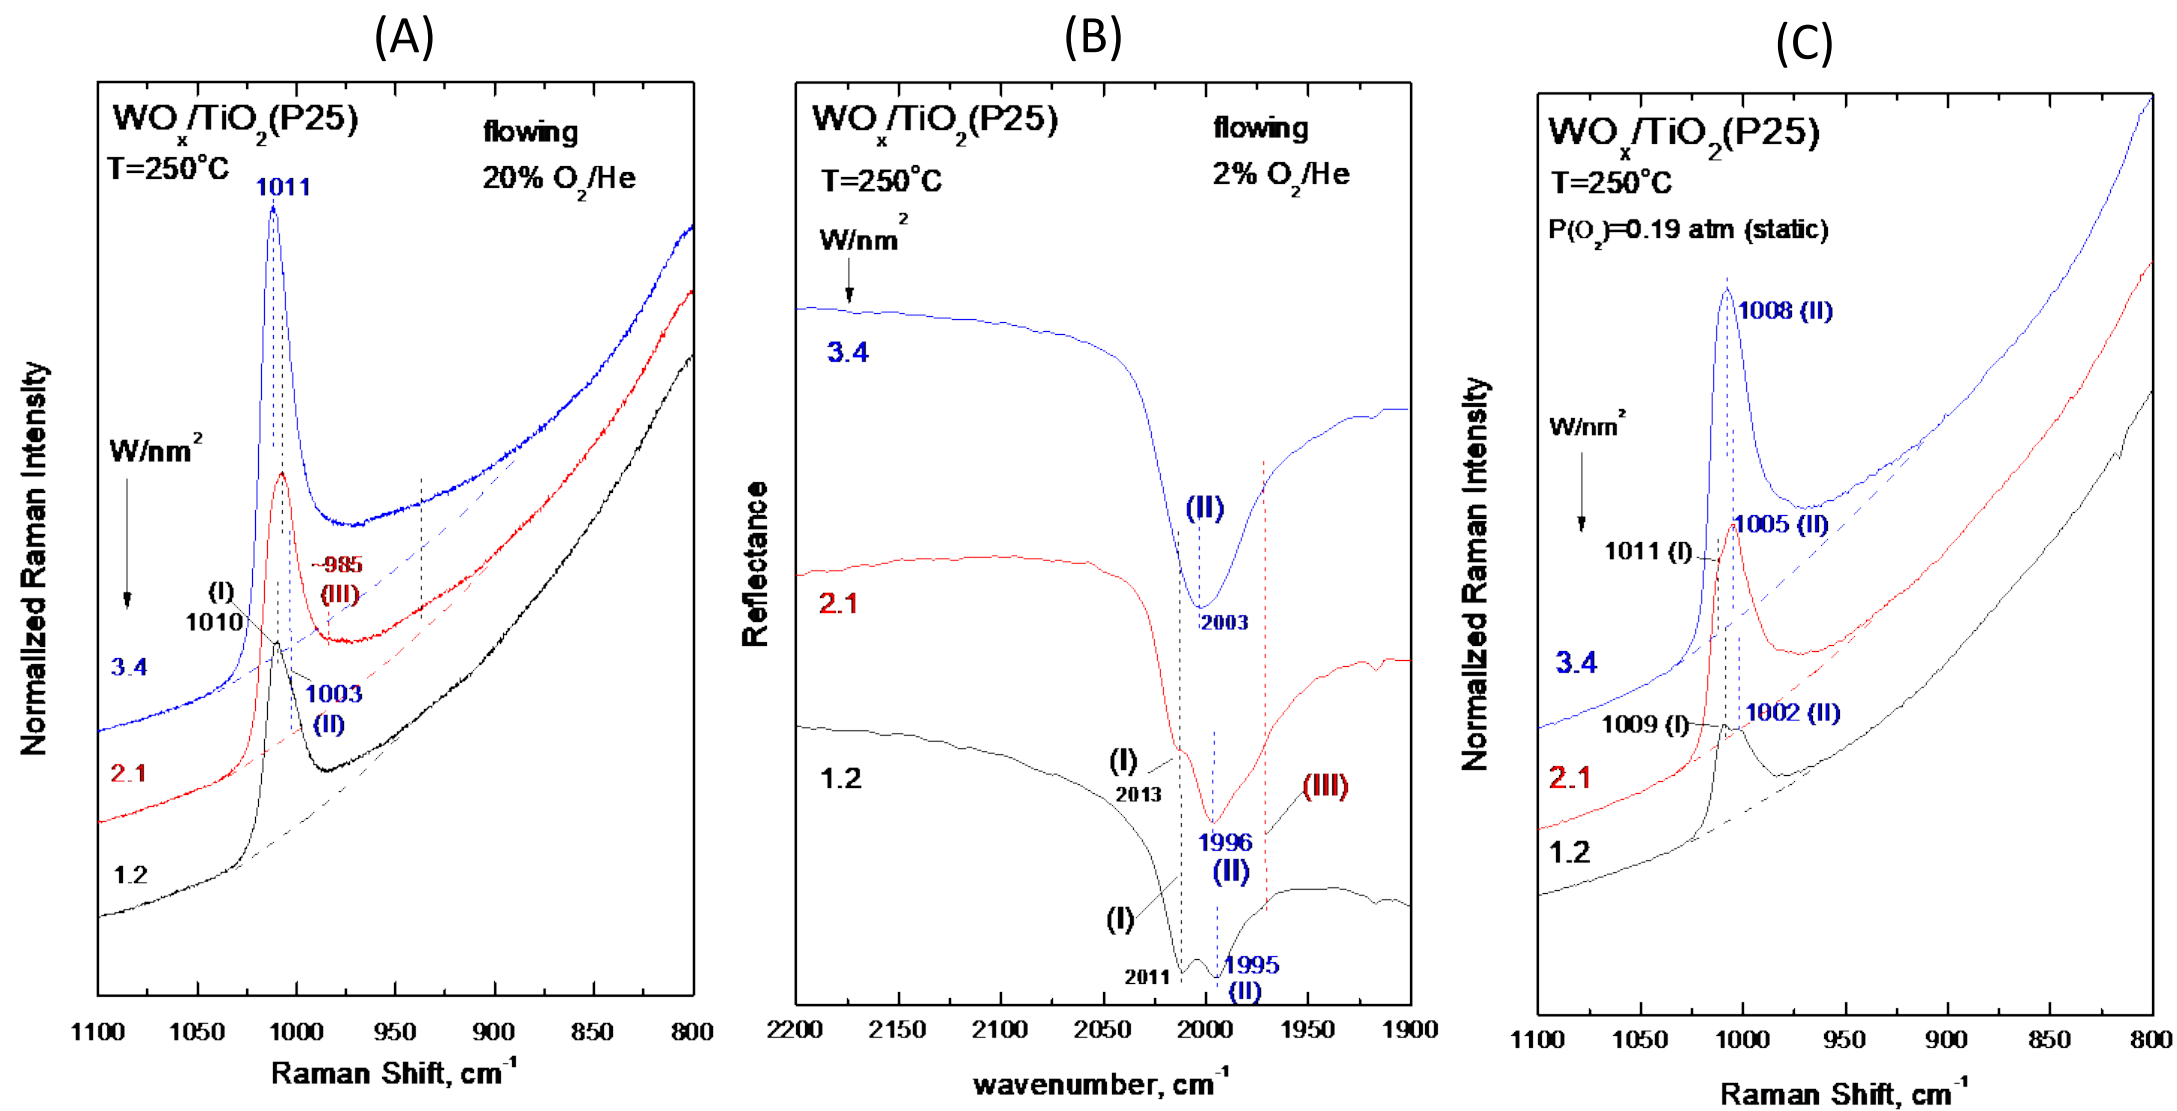

FIGURE S2

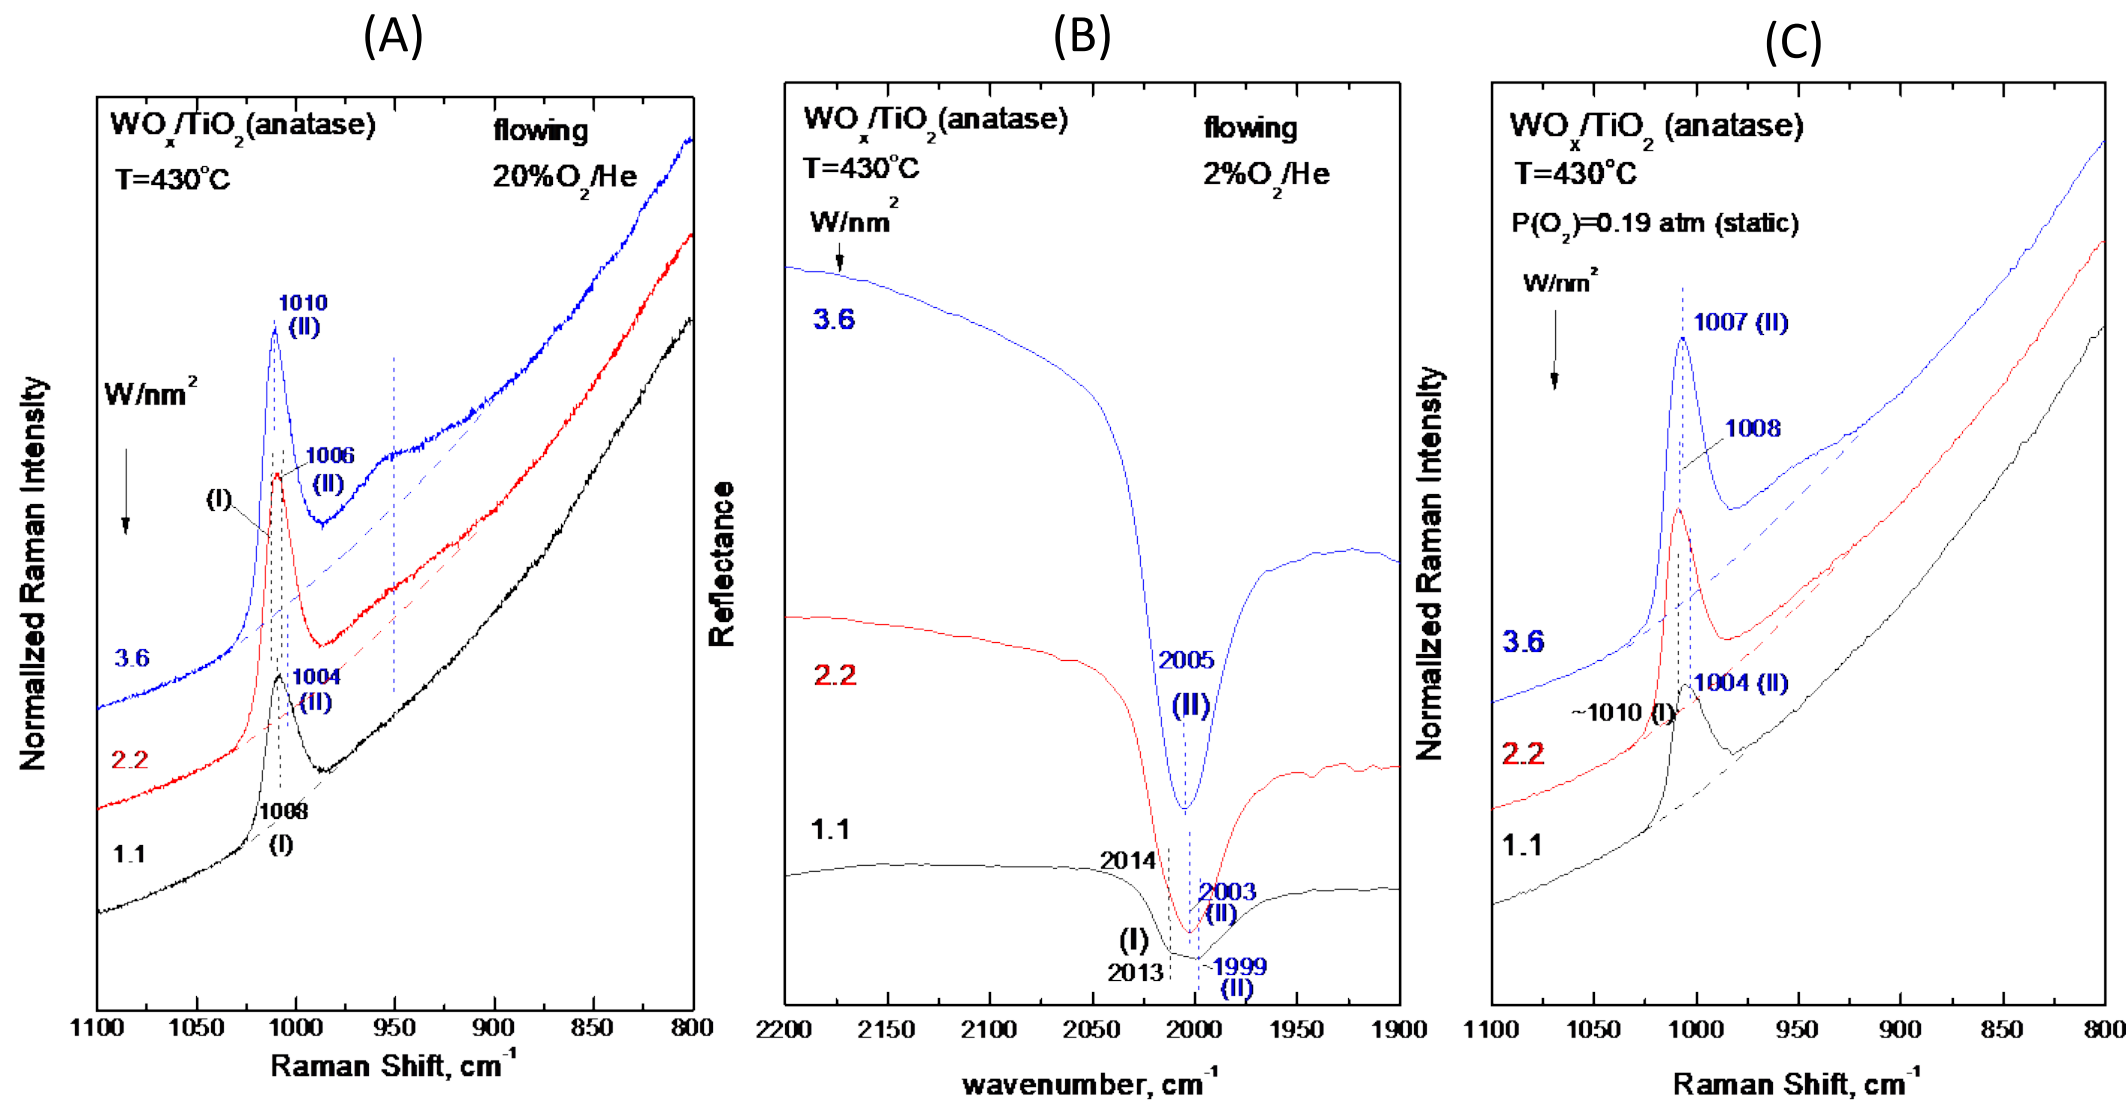

**FIGURE S3**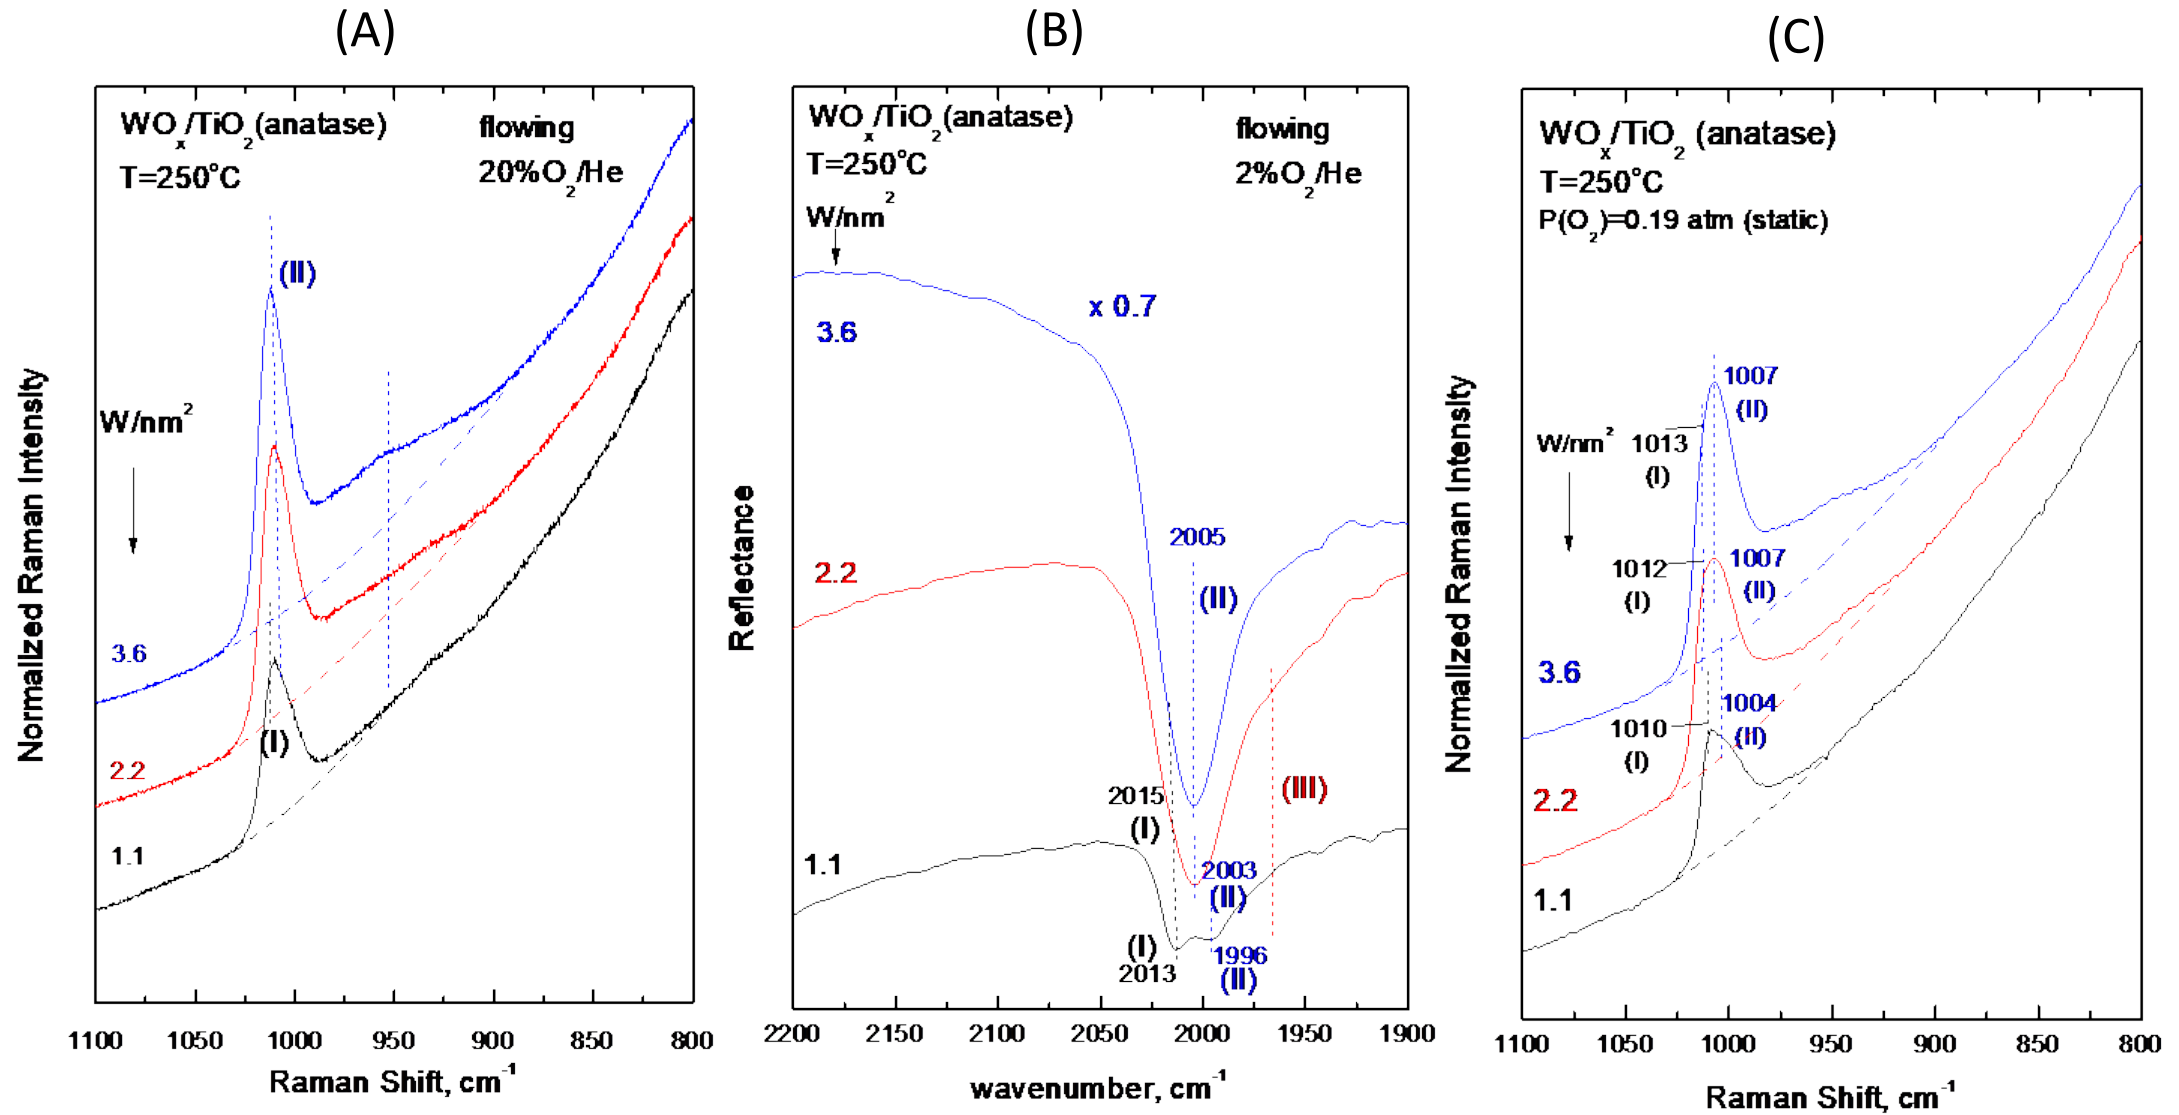

FIGURE S4

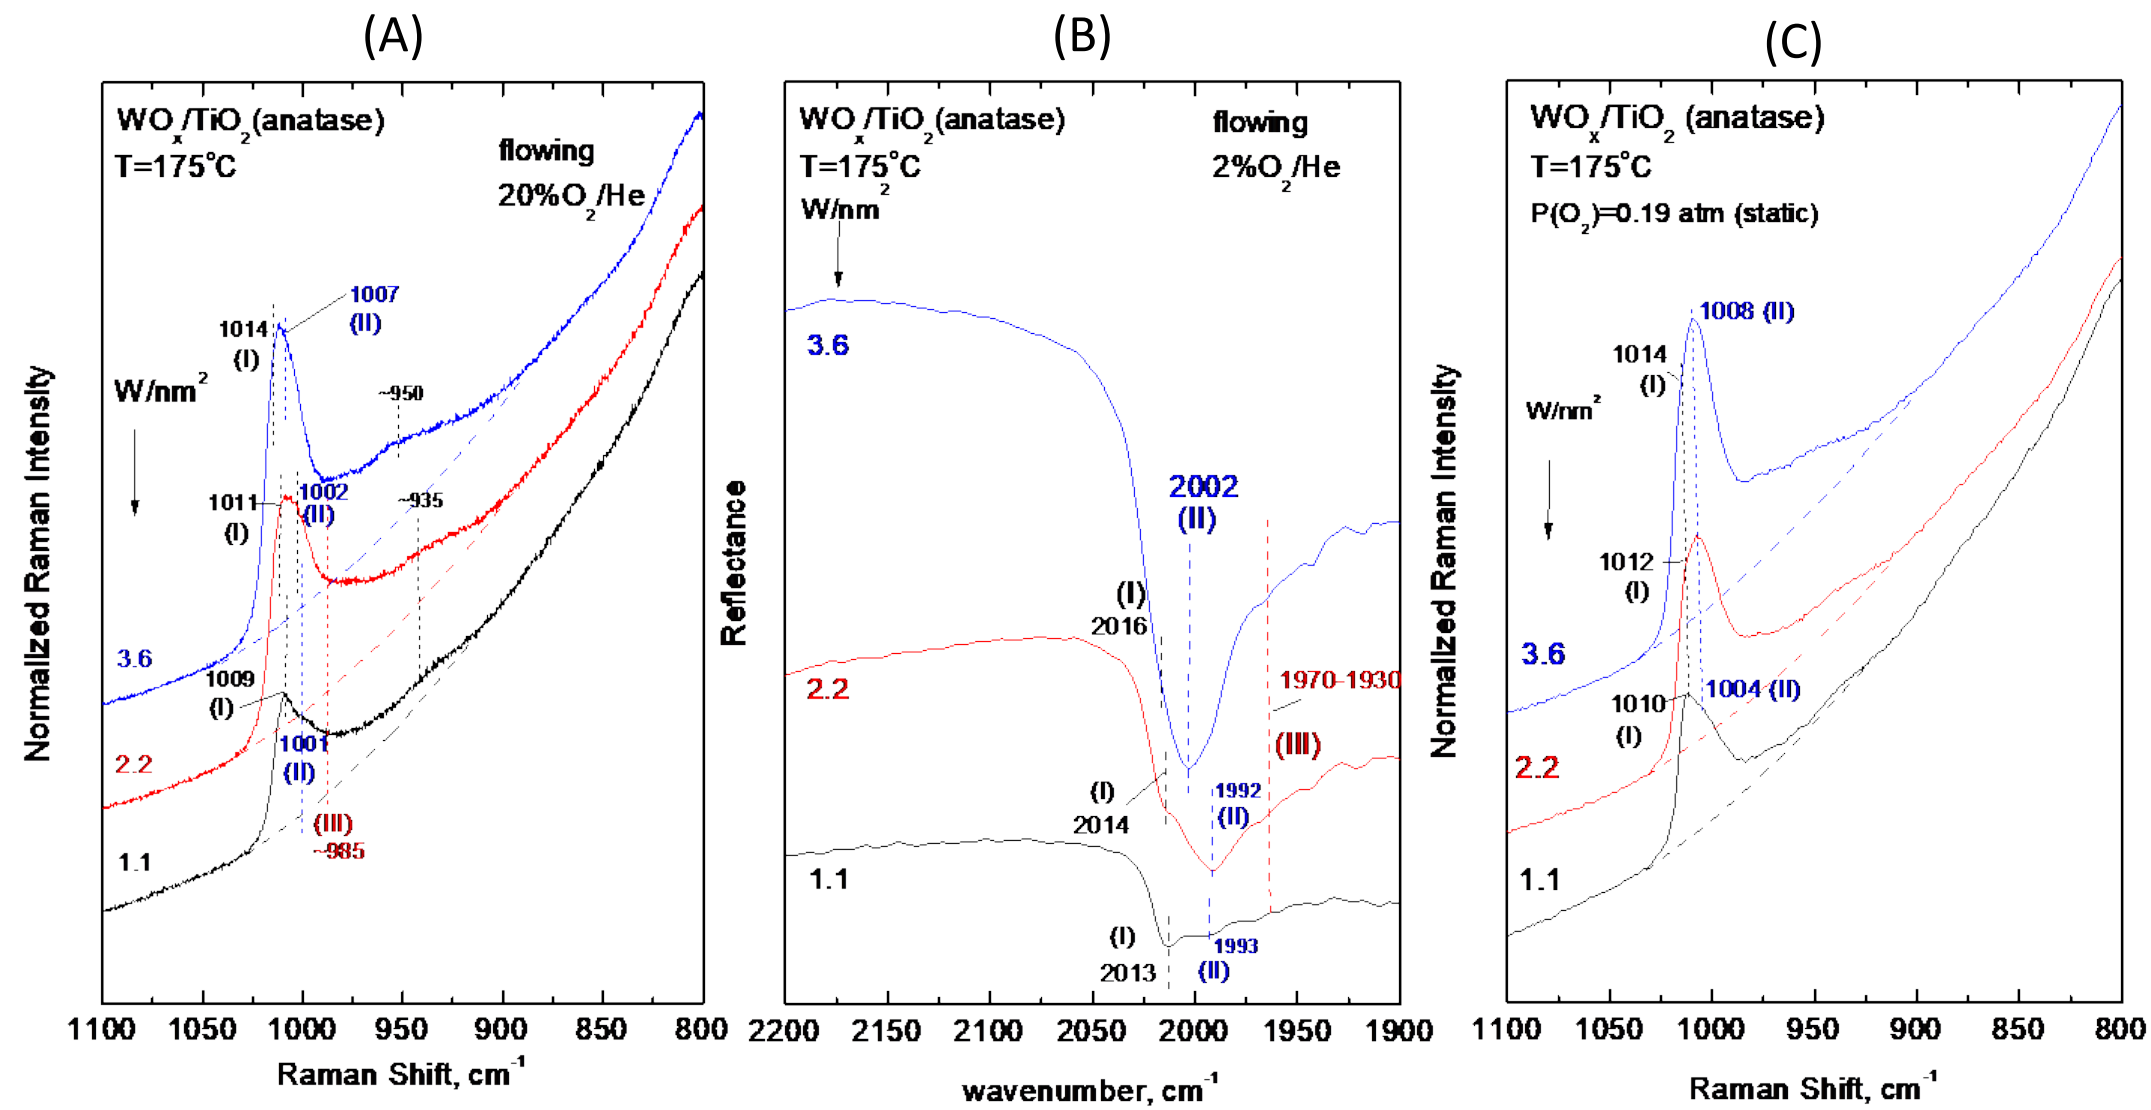

Supplement: d2dt00595f1.pdf [file d2dt00595f1.pdf]
